# Supplementary material for: Flame-retarding nanoparticles as the compatibilizers for immiscible polymer blends: simultaneously enhanced mechanical performance and flame retardancy
Source: Royal Society of Chemistry journal article supplement (doi:10.1039/c8ta12233d), 2019-01-01
Supplement: c8ta12233d1.pdf [file c8ta12233d1.pdf]

## Electronic Supplementary Information

### **Flame-retarding Nanoparticles as the Compatibilizers for Immiscible Polymer Blends: Simultaneously Enhanced Mechanical Performance and Flame Retardancy**

Zhiang Fu,<sup>a,b</sup> Hengti Wang,<sup>a</sup> Xuewen Zhao,<sup>a</sup> Xuan Li,<sup>a</sup> Xiaoying Gu<sup>a</sup> and Yongjin Li<sup>\*a</sup>

<sup>a</sup> *College of Materials, Chemistry and Chemical Engineering, Hangzhou Normal University, No. 16 Xuelin Rd., Hangzhou, 310036, People's Republic of China*  
*E-mail: yongjin-li@hznu.edu.cn.*

<sup>b</sup> *CAS Center for Excellent on TMRS Energy System, Shanghai Institute of Applied Physics, Chinese Academy of Sciences, Shanghai 201800, People's Republic of China*

### Table of contents

|                   |                                                                                                                                                                                                                            |
|-------------------|----------------------------------------------------------------------------------------------------------------------------------------------------------------------------------------------------------------------------|
| <b>Formula S1</b> | Formula for calculating the grafting ratio of PMMA with epoxy group on Boehmite nanorods surface                                                                                                                           |
| <b>Table S1</b>   | Molecular parameter of PMMA-COOH and the surface modified Boehmite nanorods                                                                                                                                                |
| <b>Table S2</b>   | The work of fracture of the PVDF/PLLA blends with the Boehmite nanorods                                                                                                                                                    |
| <b>Table S3</b>   | The LOI of PVDF/PLLA blends with different phase size                                                                                                                                                                      |
| <b>Figure S1</b>  | GPC curve (a) and <sup>1</sup> H-NMR (b) spectrum of PMMA-COOH, which number-average molecular weight ( $M_n$ ) is 3850.                                                                                                   |
| <b>Figure S2</b>  | The particles distribution diagram of PVDF/PLLA (50/50, w/w) blends (I) melt mixing with 3wt% pristine Boehmite (II), Boehmite-GPS (III) and Boehmite-GPS-PMMA (IV) nanorods respectively.                                 |
| <b>Figure S3</b>  | SEM (a) and TEM (b) image of PVDF/PLLA (50/50) blends.                                                                                                                                                                     |
| <b>Figure S4</b>  | SEM images and EDS scan of the PVDF/PLLA (70/30) (a), PVDF/PLLA/Boehmite-GPS (70/30/3) (b) and PVDF/PLLA/Boehmite-GPS-PMMA (70/30/3) (c) blends. The mark of 1, 2 and 3 in SEM are correspond to the subscript in the EDS. |
| <b>Figure S5</b>  | The particles distribution diagram of PVDF/PLLA (50/50, w/w) (a) and PVDF/PLLA (70/30, w/w) (b) blends melt mixing with 0 wt%, 1 wt%, 3wt% and 5 wt% Boehmite-GPS-PMMA nanorods respectively.                              |
| <b>Figure S6</b>  | The TEM images of the PVDF/PLLA/Boehmite-GPS-PMMA (50/50/3). The number-average molecular weight of the PMMA chain grafted onto the Boehmite-GPS-PMMA is 2000 g/mol (a), 3850 g/mol (b) and 8600 g/mol (c) respectively.   |
| <b>Figure S7</b>  | The storage modulus (a) and complex viscosity (b) of PVDF/PLLA                                                                                                                                                             |

|                   |                                                                                                                                                                                                                                                                                                                             |
|-------------------|-----------------------------------------------------------------------------------------------------------------------------------------------------------------------------------------------------------------------------------------------------------------------------------------------------------------------------|
|                   | (70/30), PVDF/PLLA/Boehmite-GPS (70/30/3) and PVDF/PLLA/Boehmite-GPS-PMMA (70/30/3)                                                                                                                                                                                                                                         |
| <b>Figure S8</b>  | TEM (1) and SEM (2) image of morphologies of PLLA/PVDF (50/50, w/w) (a) blends with 3wt% PS-g-GMA-g-PMMA(b) and (c) Boehmite-GPS-PMMA nanorods respectively.                                                                                                                                                                |
| <b>Figure S9</b>  | The particles distribution diagram of PVDF/PLLA (50/50, w/w) (a) blends with 3wt% PS-g-GMA-g-PMMA(b) and (c) Boehmite-GPS-PMMA nanorods respectively.                                                                                                                                                                       |
| <b>Figure S10</b> | FTIR spectra of: (I) Boehmite-GPS-PMMA, (II) PVDF/PLLA/Boehmite-GPS-PMMA (70/30/3) blend mixed for 1 min; (III) PVDF/PLLA/Boehmite-GPS-PMMA (70/30/3) mixed for 10 min.                                                                                                                                                     |
| <b>Figure S11</b> | (a) The TGA and DTG of the PVDF/PLLA (70/30), PVDF/PLLA/Boehmite-GPS (70/30/3) and PVDF/PLLA/Boehmite-GPS-PMMA (70/30/3) blends under air as purge gas; (b) The TGA and DTG of the PVDF/PLLA/Boehmite-GPS-PMMA (70/30/1), PVDF/PLLA/Boehmite-GPS-PMMA (70/30/3) and PVDF/PLLA/Boehmite-GPS-PMMA (70/30/3) blends under air. |
| <b>Figure S12</b> | SEM image and EDS scan of the residue of the PVDF/PLLA (70/30), PVDF/PLLA/Boehmite-GPS (70/30/3) and PVDF/PLLA/Boehmite-GPS-PMMA (70/30/3) blends. The mark of 1, 2 and 3 in SEM are correspond to the subscript in the EDS.                                                                                                |
| <b>Figure S13</b> | FTIR spectra (a) and XRD images (b) of the white powders of PVDF/PLLA (70/30, w/w) blends after the combustion of LOI test.                                                                                                                                                                                                 |

$$\begin{aligned}
E_{PMMA} &= \frac{n_{Actual PMMA}}{n_{Idea PMMA}} \\
&= \frac{\bar{M}n_{GPS} \cdot f_{Boehmite} \cdot (f_{Boehmite - GPS} - f_{Boehmite - GPS - PMMA})}{\bar{M}n_{PMMA - COOH} \cdot f_{Boehmite - GPS - PMMA} \cdot f_{Boehmite} \cdot (f_{Boehmite} - f_{Boehmite - GPS})} \dots\dots \\
&\dots\dots(1)
\end{aligned}$$

**Formula S1.** Formula for calculating the grafting ratio of PMMA with epoxy group on Boehmite nanorods surface. Where  $E_{PMMA - COOH}$  is the grafting ratio of the grafted PMMA chain on the surface of Boehmite nanorods, which based on the GPS content on the Boehmite nanorods.  $n_{actual PMMA}$  is the actual number mole of grafting PMMA chain on the surface of Boehmite nanorods.  $n_{Idea PMMA}$  is the number mole of theory obtained grafting PMMA chain on the surface of Boehmite nanorods, which calculated by the content of GPS on the Boehmite nanorods surface.  $\bar{M}n_{GPS}$  and  $\bar{M}n_{PMMA - COOH}$  is the molecular weight of 3-Glycidoxypropyl trimethoxysilane (GPS) and carboxyl-terminated polymethyl methacrylate (PMMA-COOH) respectively.  $f_{Boehmite}$ ,  $f_{Boehmite - GPS}$  and  $f_{Boehmite - GPS - PMMA}$  represent the inorganic residual content of pristine Boehmite, Boehmite-GPS, and Boehmite-GPS-PMMA nanorods respectively after the TGA test respectively.

**Table S1.** Molecular parameter of PMMA-COOH and the surface modified Boehmite

| nanorods              |                    |         |               |               |                    |                            |                      |                       |                     |
|-----------------------|--------------------|---------|---------------|---------------|--------------------|----------------------------|----------------------|-----------------------|---------------------|
| Sample                | $M_n^a$<br>(g/mol) | $PDI^a$ | $d^b$<br>(nm) | $l^b$<br>(nm) | $T_d^c$<br>(°C)    | $f_{inorganic}^c$<br>(wt%) | $w_{GPS}^d$<br>(wt%) | $w_{PMMA}^d$<br>(wt%) | $E_{PMMA}^d$<br>(%) |
| PMMA-COOH             | 3850±60            | 2.24    |               |               | 398.8              | 0                          |                      |                       |                     |
| Boehmite              |                    |         | 8.2±2.2       | 98±23         | 446.1              | 80.7±0.1                   |                      |                       |                     |
| Boehmite-GPS          |                    |         | 8.1±1.9       | 86±19         | 472.3              | 79.3±0.1                   | 1.8±0.2              |                       |                     |
| Boehmite-GPS<br>-PMMA | 3850±60            | 2.24    | 16.8±5.6      | 93±25         | 392.1 and<br>481.1 | 66.7±0.2                   | 1.8±0.2              | 19.2±0.6              | 66.7±10.6           |

<sup>a</sup> Measure from GPC plots using THF as eluent and PS to linear calibration at 35 °C

(M<sub>n</sub>: number-averaged molecular weight of the single PMMA chains; PDI:

polydispersity (M<sub>w</sub>/M<sub>n</sub>) of the single PMMA chains).

<sup>b</sup> Measured from TEM images (d: number-averaged diameter of nanorods; number-averaged length of nanorods).

<sup>c</sup> Measured from the TGA and DTG curves. (T<sub>d</sub>: the TGA temperature with maximum loss rate;  $f_{inorganic}$ : the inorganic oxide residual content ).

<sup>d</sup> Calculated on the basis of TGA data ( $w_{GPS}$ : the grafting content of the GPS on the surface of Boehmite nanorods;  $w_{PMMA}$ : the grafting content of the PMMA on the surface of Boehmite nanorods;  $E_{PMMA}$ : the grafting ratio of the grafted PMMA chain on the surface of Boehmite nanorods calculated by Formula S1, which is based on the GPS content on the Boehmite nanorods.).

**Table S2.** The work of fracture of the PVDF/PLLA blends with the Boehmite nanorods

| <b>Sample</b> | <b>Sample Composition</b>             | <b><i>Work of Fracture</i></b><br><b><i>/J.m<sup>-2</sup></i></b> |
|---------------|---------------------------------------|-------------------------------------------------------------------|
| 1             | PVDF/PLLA (50/50)                     | $1.04 \times 10^5$                                                |
| 2             | PVDF/PLLA/Boehmite (50/50/3)          | $1.07 \times 10^5$                                                |
| 3             | PVDF/PLLA/Boehmite-GPS (50/50/3)      | $1.48 \times 10^5$                                                |
| 4             | PVDF/PLLA/Boehmite-GPS-PMMA (50/50/1) | $1.47 \times 10^5$                                                |
| 5             | PVDF/PLLA/Boehmite-GPS-PMMA (50/50/3) | $4.47 \times 10^5$                                                |
| 6             | PVDF/PLLA/Boehmite-GPS-PMMA (50/50/5) | $1.08 \times 10^6$                                                |
| 7             | PVDF/PLLA(70/30)                      | $2.40 \times 10^4$                                                |
| 8             | PVDF/PLLA/Boehmite-GPS-PMMA (70/30/1) | $2.34 \times 10^5$                                                |
| 9             | PVDF/PLLA/Boehmite-GPS-PMMA (70/30/3) | $7.14 \times 10^5$                                                |
| 10            | PVDF/PLLA/Boehmite-GPS-PMMA (70/30/5) | $1.15 \times 10^6$                                                |

**Table S3.** The LOI of PVDF/PLLA blends with different phase size

| Sample | Sample Composition                    | LOI <sup>a</sup> (%) |
|--------|---------------------------------------|----------------------|
| 1      | PVDF/PLLA (50/50)                     | 24.1%                |
| 2      | PVDF/PLLA/PS-g-GMA-g-PMMA (50/50/3)   | 24.3%                |
| 3      | PVDF/PLLA/Boehmite-GPS-PMMA (50/50/3) | 28.6%                |

<sup>a</sup> Limited oxygen index was measured by Oxygen index instrument

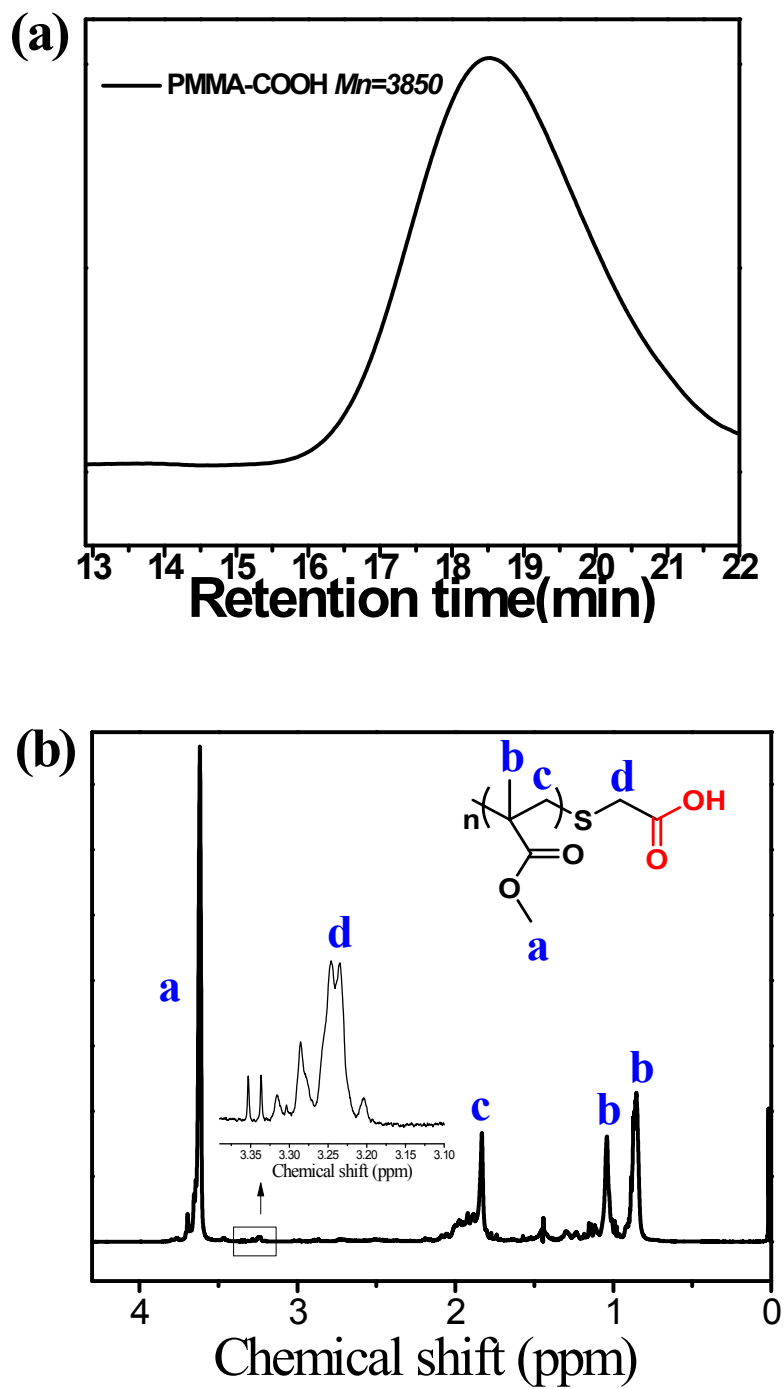

**Figure S1.** GPC curve (a) and  $^1\text{H-NMR}$  (b) spectrum of PMMA-COOH, which number-average molecular weight ( $M_n$ ) is 3850.



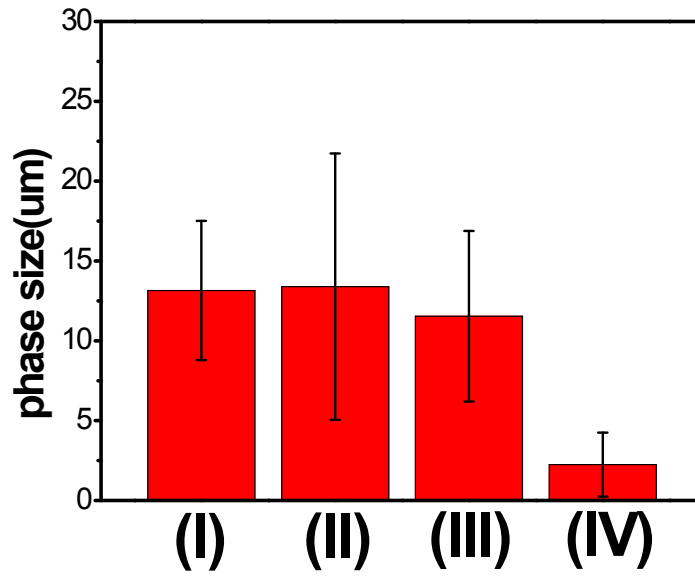

**Figure S2.** The particles distribution diagram of PVDF/PLLA (50/50, w/w) blends (I) melt mixing with 3wt% pristine Boehmite (II), Boehmite-GPS (III) and Boehmite-GPS-PMMA (IV) nanorods respectively.

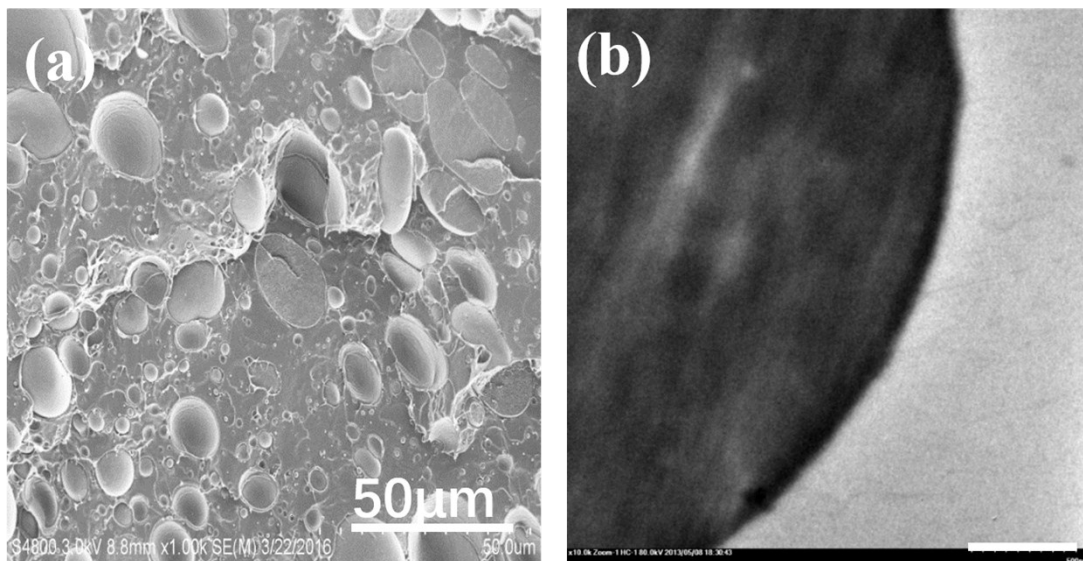

**Figure S3.** SEM (a) and TEM (b) image of PVDF/PLLA (50/50) blends.

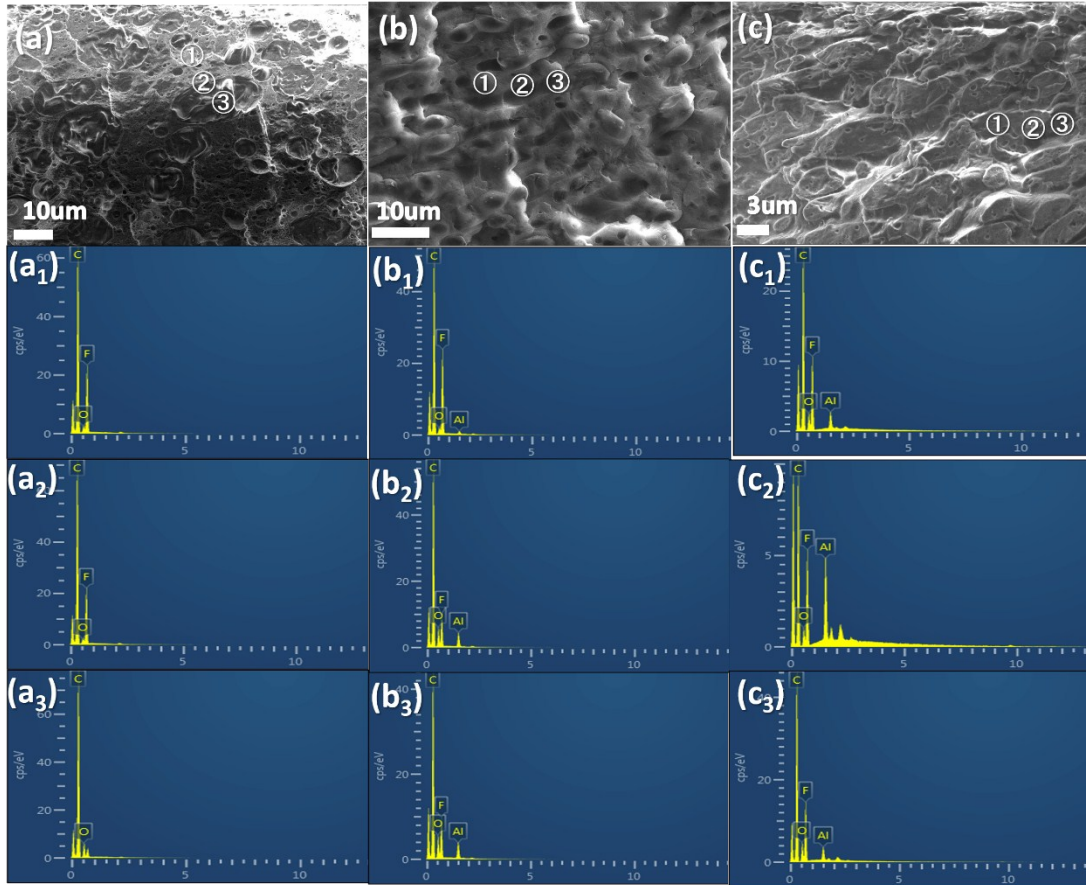

**Figure S4.** SEM images and EDS scan of the PVDF/PLLA (70/30) (a), PVDF/PLLA/Boehmite-GPS (70/30/3) (b) and PVDF/PLLA/Boehmite-GPS-PMMA (70/30/3) (c) blends. The mark of 1, 2 and 3 in SEM are correspond to the subscript in the EDS.

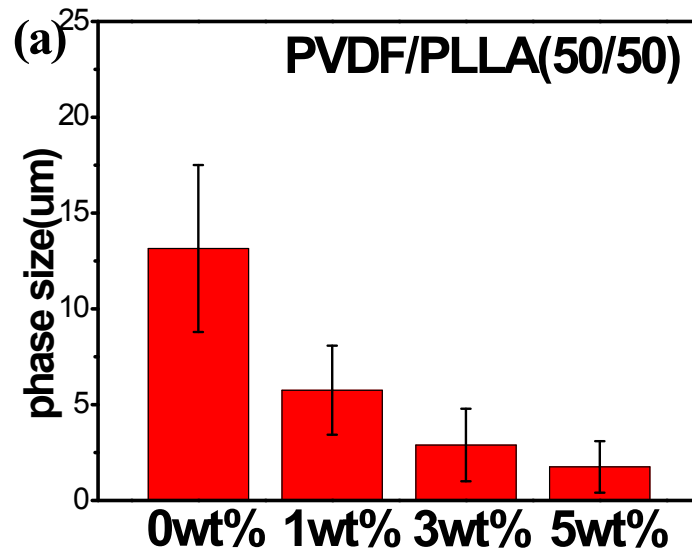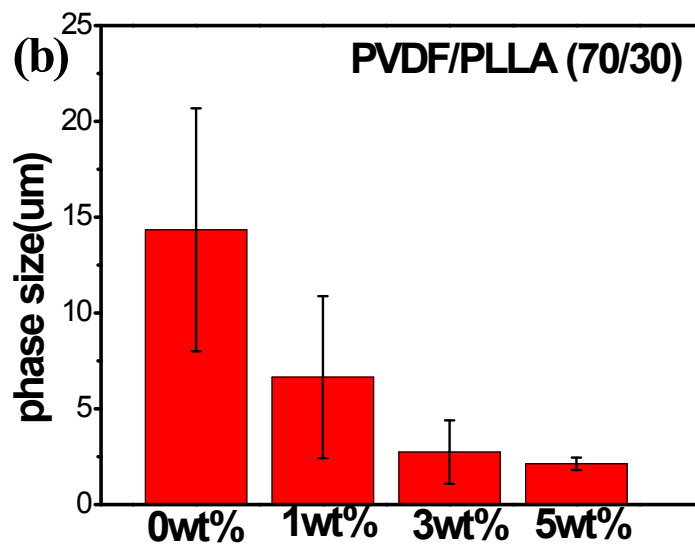

**Figure S5.** The particles distribution diagram of PVDF/PLLA (50/50, w/w) (a) and PVDF/PLLA (70/30, w/w) (b) blends melt mixing with 0 wt%,1 wt%, 3wt% and 5 wt% Boehmite-GPS-PMMA nanorods respectively.

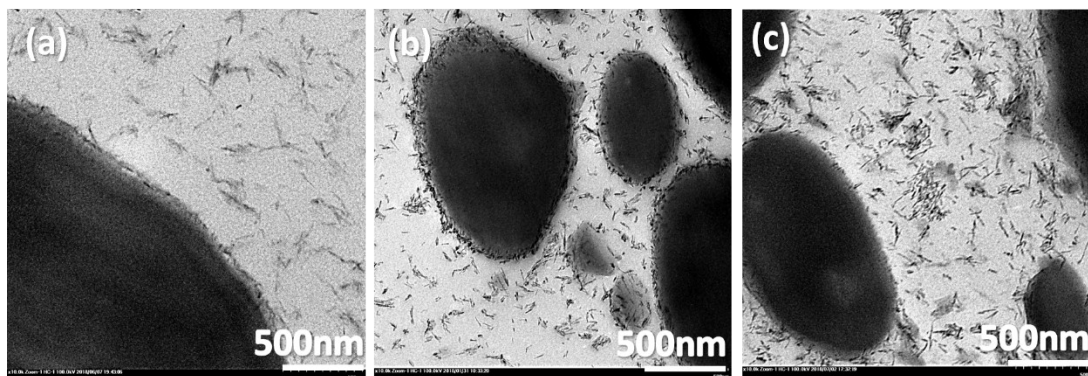

**Figure S6.** The TEM images of the PVDF/PLLA/Boehmite-GPS-PMMA (50/50/3). The number-average molecular weight of the PMMA chain grafted onto the Boehmite-GPS-PMMA is 2000 g/mol (a), 3850 g/mol (b) and 8600 g/mol (c) respectively.

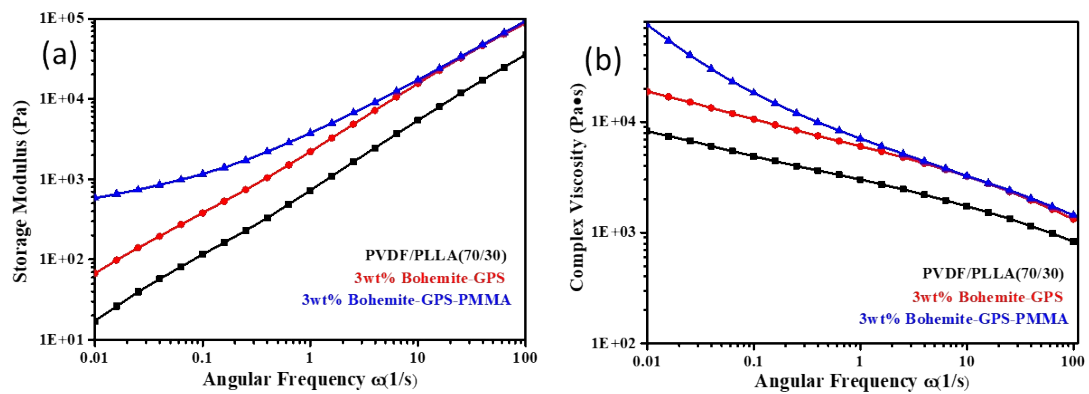

**Figure S7.** The storage modulus (a) and complex viscosity (b) of PVDF/PLLA (70/30), PVDF/PLLA/Boehmite-GPS (70/30/3) and PVDF/PLLA/Boehmite-GPS-PMMA (70/30/3)

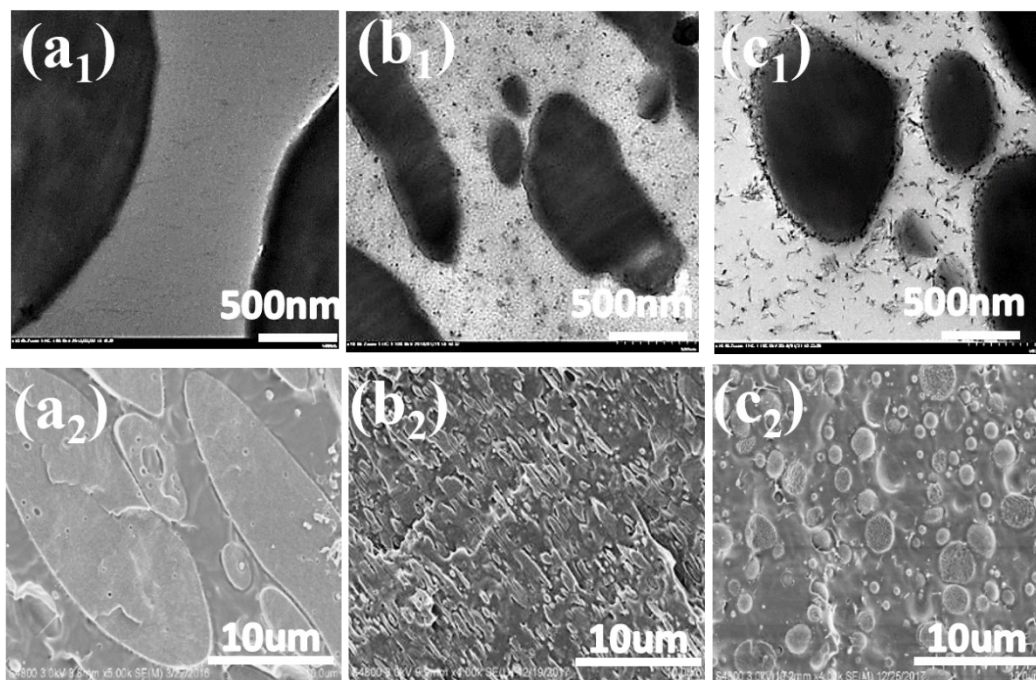

**Figure S8.** TEM (1) and SEM (2) image of morphologies of PLLA/PVDF (50/50, w/w) (a) blends with 3wt% PS-g-GMA-g-PMMA(b) and (c) Boehmite-GPS-PMMA nanorods respectively.

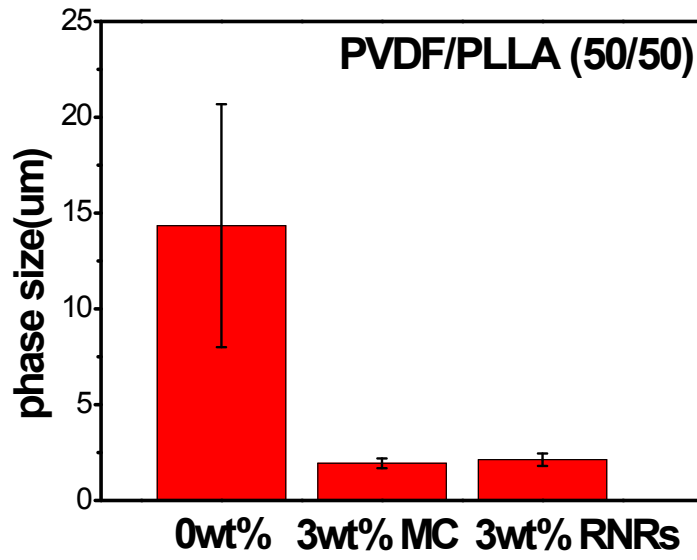

**Figure S9.** The particles distribution diagram of PVDF/PLLA (50/50, w/w) (a) blends with 3wt% PS-g-GMA-g-PMMA(b) and (c) Boehmite-GPS-PMMA nanorods respectively.



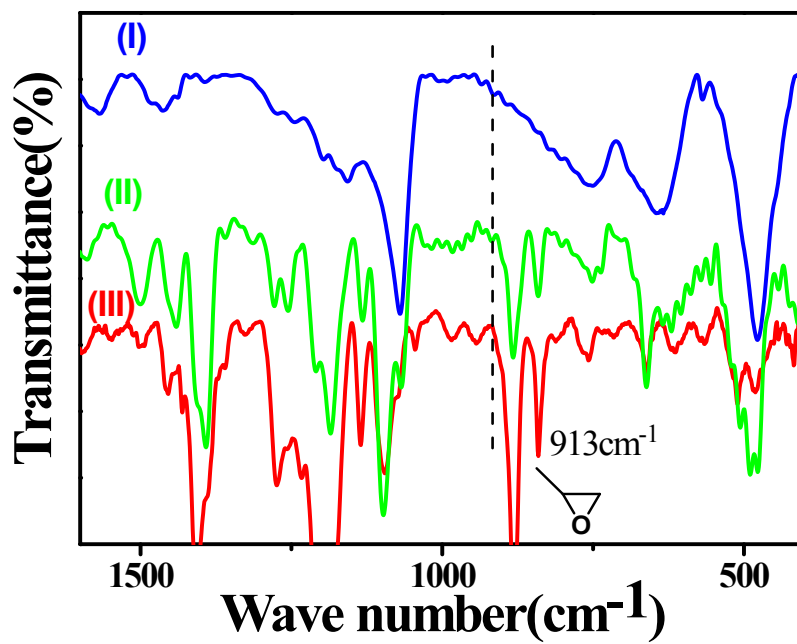

**Figure S10.** FTIR spectra of: (I) Boehmite-GPS-PMMA, (II) PVDF/PLLA/Boehmite-GPS-PMMA (70/30/3) blend mixed for 1 min; (III) PVDF/PLLA/Boehmite-GPS-PMMA (70/30/3) mixed for 10 min.

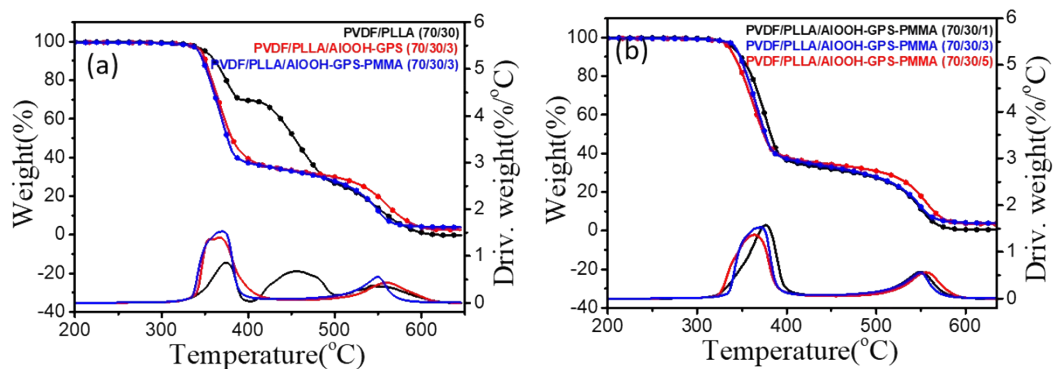

**Figure S11** (a) The TGA and DTG of the PVDF/PLLA (70/30), PVDF/PLLA/Boehmite-GPS (70/30/3) and PVDF/PLLA/Boehmite-GPS-PMMA (70/30/3) blends under air as purge gas; (b) The TGA and DTG of the PVDF/PLLA/Boehmite-GPS-PMMA (70/30/1), PVDF/PLLA/Boehmite-GPS-PMMA (70/30/3) and PVDF/PLLA/Boehmite-GPS-PMMA (70/30/3) blends under air.

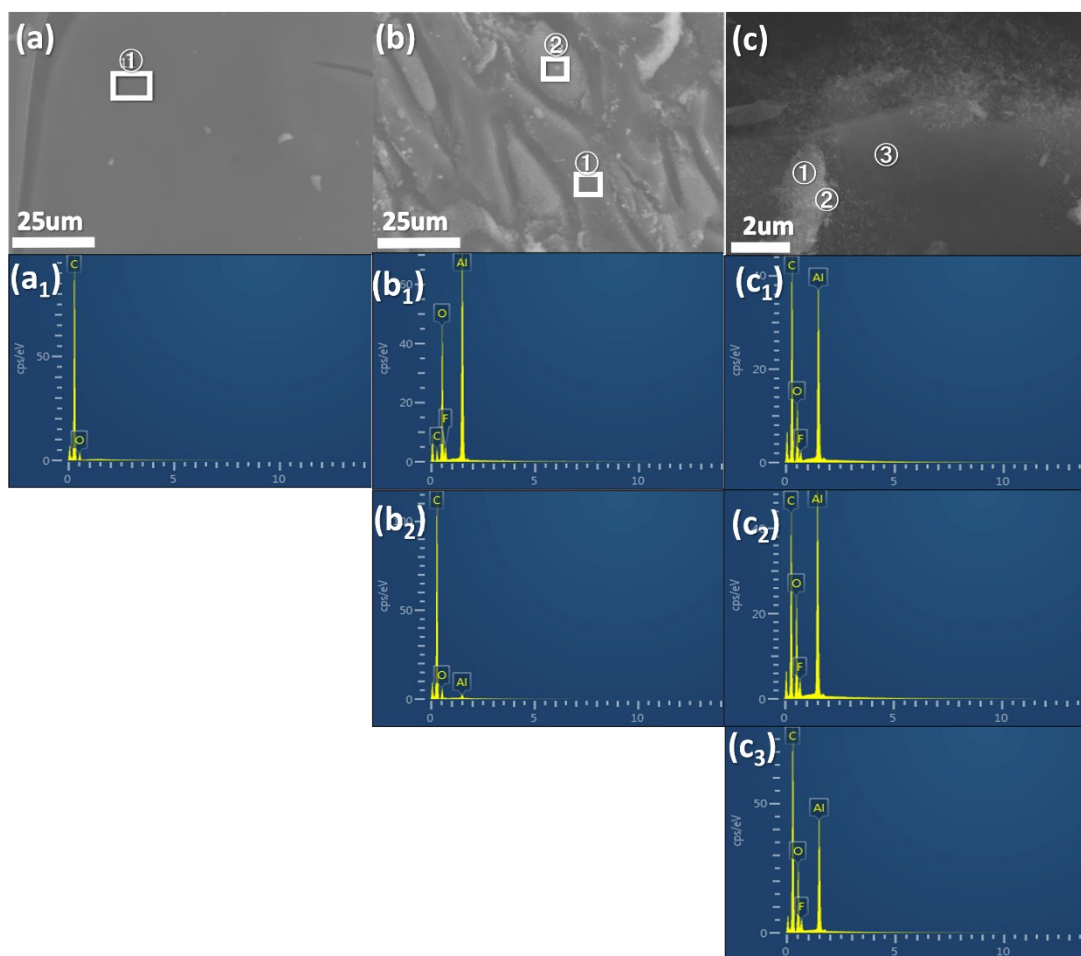

**Figure S12.** SEM image and EDS scan of the residue of the PVDF/PLLA (70/30), PVDF/PLLA/Boehmite-GPS (70/30/3) and PVDF/PLLA/Boehmite-GPS-PMMA (70/30/3) blends. The mark of 1, 2 and 3 in SEM are correspond to the subscript in the EDS.

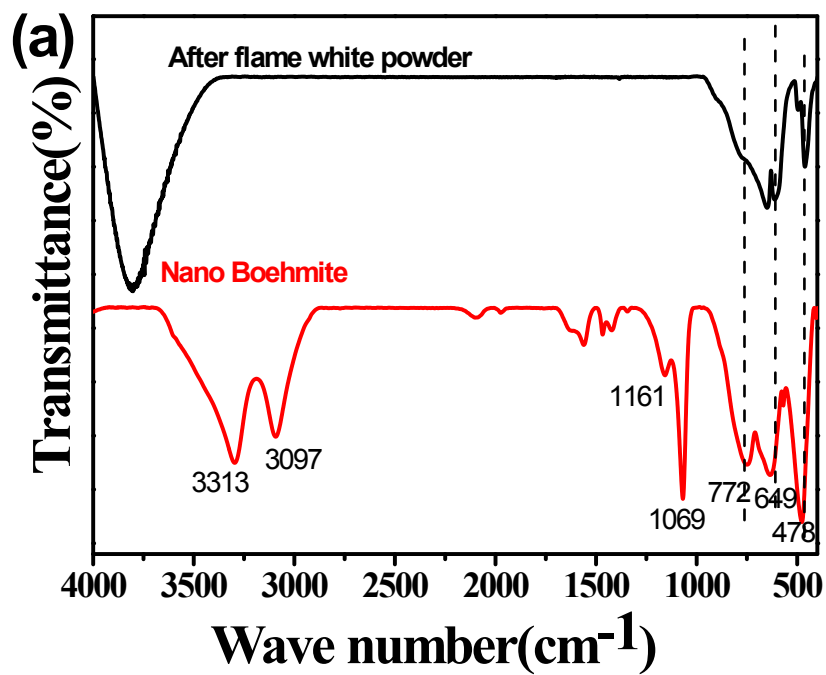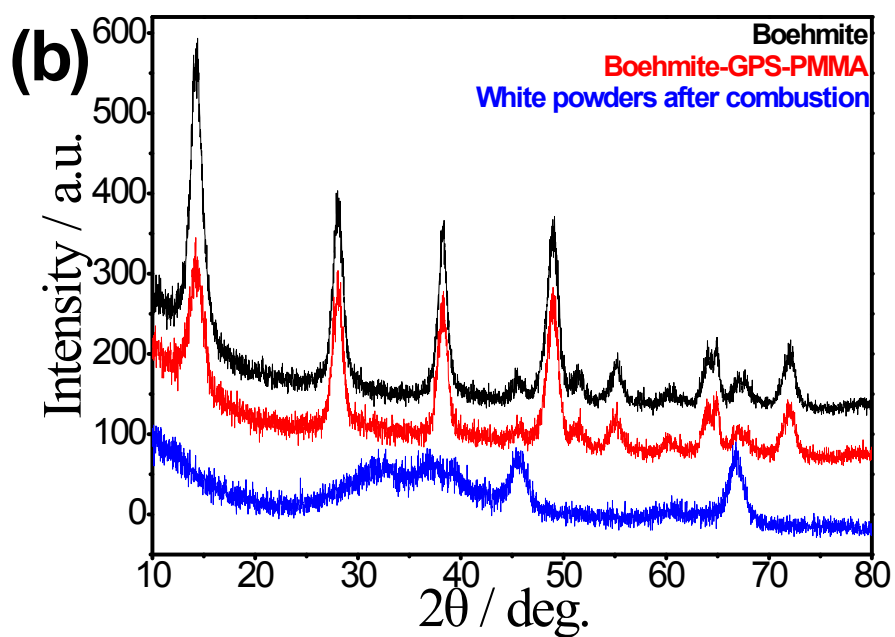

**Figure S13.** FTIR spectra (a) and XRD images (b) of the white powders of PVDF/PLLA (70/30, w/w) blends after the combustion of LOI test.
